# Supplementary material
Source: PubMed Central journal article supplement (PMC8487618)
Supplement: 705_2021_5258_MOESM2_ESM.pdf [file 705_2021_5258_MOESM2_ESM.pdf]

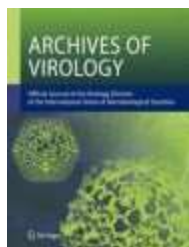

**SARS-CoV-2 genetic diversity in South America: demographic history and structuration signals**

**Online resource 2.**

**Table S1. The lineages identified at each country**

| Argentina |       | Brazil   |       | Chile    |       | Colombia  |       | Ecuador  |       | Peru      |       | Suriname |       |
|-----------|-------|----------|-------|----------|-------|-----------|-------|----------|-------|-----------|-------|----------|-------|
| L         | %     | L        | %     | L        | %     | L         | %     | L        | %     | L         | %     | L        | %     |
| B.1       | 0,333 | A.2      | 0,007 | A        | 0,006 | A.1       | 0,028 | A.1      | 0,015 | A.1       | 0,010 | B.1.219  | 0,953 |
| B.1.1     | 0,212 | B        | 0,005 | A.1      | 0,006 | A.2       | 0,019 | B.1      | 0,328 | A.2       | 0,033 | N.2      | 0,047 |
| B.1.1.1   | 0,091 | B.1      | 0,087 | A.2      | 0,062 | A.5       | 0,028 | B.1.1    | 0,313 | A.5       | 0,023 |          |       |
| B.1.220   | 0,030 | B.1.1    | 0,063 | A.5      | 0,043 | B         | 0,009 | B.1.1.1  | 0,090 | B         | 0,007 |          |       |
| B.1.499   | 0,121 | B.1.1.28 | 0,305 | B        | 0,031 | B.1       | 0,514 | B.1.1.10 | 0,015 | B.1       | 0,155 |          |       |
| C.22      | 0,030 | B.1.1.33 | 0,500 | B.1      | 0,389 | B.1.1     | 0,093 | B.1.223  | 0,104 | B.1.1     | 0,201 |          |       |
| N.3       | 0,182 | B.1.195  | 0,002 | B.1.1    | 0,173 | B.1.1.231 | 0,009 | B.1.225  | 0,015 | B.1.1.1   | 0,135 |          |       |
|           |       | B.1.212  | 0,014 | B.1.1.10 | 0,012 | B.1.1.388 | 0,019 | B.1.308  | 0,015 | B.1.1.110 | 0,020 |          |       |
|           |       | B.1.9    | 0,002 | B.1.1.33 | 0,043 | B.1.104   | 0,009 | B.1.371  | 0,015 | B.1.1.220 | 0,003 |          |       |
|           |       | B.3      | 0,002 | B.1.110  | 0,179 | B.1.111   | 0,168 | B.1.67   | 0,075 | B.1.1.370 | 0,003 |          |       |
|           |       | B.39     | 0,005 | B.1.111  | 0,012 | B.1.314   | 0,009 | B.1.9    | 0,015 | B.1.1.381 | 0,010 |          |       |
|           |       | B.40     | 0,002 | B.1.355  | 0,006 | B.1.420   | 0,065 |          |       | B.1.13    | 0,003 |          |       |
|           |       | B.59     | 0,002 | B.29     | 0,006 | B.1.610   | 0,009 |          |       | B.1.205   | 0,086 |          |       |
|           |       | B.6      | 0,002 | B.40     | 0,006 | B.1.8     | 0,009 |          |       | B.1.547   | 0,003 |          |       |
|           |       |          |       | C.11     | 0,019 | B.29      | 0,009 |          |       | B.1.8     | 0,007 |          |       |
|           |       |          |       | N.4      | 0,006 |           |       |          |       | B.3       | 0,003 |          |       |
|           |       |          |       |          |       |           |       |          |       | C.13      | 0,043 |          |       |
|           |       |          |       |          |       |           |       |          |       | C.14      | 0,162 |          |       |
|           |       |          |       |          |       |           |       |          |       | C.22      | 0,003 |          |       |
|           |       |          |       |          |       |           |       |          |       | C.25      | 0,026 |          |       |

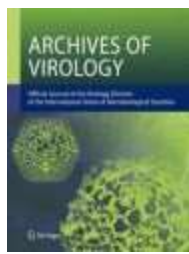


---

|      |       |
|------|-------|
| C.32 | 0,030 |
| C.33 | 0,010 |
| C.4  | 0,023 |

---

**Table S2. Zns, SSD, Raggedness and Neutrality tests for South American populations**

|                  | Zns                | SSD <sup>1</sup> | Raggedness index <sup>1</sup> | SSD <sup>2</sup> | Raggedness index <sup>2</sup> | Arlequin            |                      |
|------------------|--------------------|------------------|-------------------------------|------------------|-------------------------------|---------------------|----------------------|
|                  |                    |                  |                               |                  |                               | Tajima's D          | Fu's Fs              |
| <b>Argentina</b> | 0.055              | 0.0017           | 0.0058                        | 0.0027           | 0.0058                        | -1.65*              | -13.51 <sup>++</sup> |
| <b>Brazil</b>    | 0.004              | 0.0007           | 0.0035                        | 0.0014           | 0.0035                        | -2.81 <sup>++</sup> | -24.39 <sup>++</sup> |
| <b>Chile</b>     | 0.002              | 0.0066           | 0.0128                        | 0.0026           | 0.0128                        | -2.38**             | -24.72 <sup>++</sup> |
| <b>Colombia</b>  | 0.023              | 0.0120           | 0.0207                        | 0.0071           | 0.0207                        | -2.40 <sup>++</sup> | -24.72 <sup>++</sup> |
| <b>Ecuador</b>   | 0.061              | 0.0041           | 0.0116                        | 0.0033           | 0.0116                        | -1.78**             | -5.202               |
| <b>Peru</b>      | 0.007 <sup>+</sup> | 0.0010           | 0.0013                        | 0.0016           | 0.0013                        | -2.69 <sup>++</sup> | -23.90 <sup>++</sup> |
| <b>Suriname</b>  | 0.086              | 0.0233           | 0.0181                        | 0.0253           | 0.0181                        | -1.60*              | -21.91 <sup>++</sup> |

\*:  $p < 0.05$ ; \*\*:  $p < 0.02$ ; +:  $p < 0.01$ ; ++:  $p < 0.001$ ; <sup>1</sup>: Expansion model; <sup>2</sup>: Spatial model. Tajima's D and Fu's Fs were computed by using both, DnaSP (Table 1, in the main manuscript) and Arlequin software.

**Table S3: Neutrality tests by each SARS-CoV-2 loci for South American populations**

| Whole Genome | N   | Gene                   | H                      | Tajima                 |                         |                        | Fu's Fs                |
|--------------|-----|------------------------|------------------------|------------------------|-------------------------|------------------------|------------------------|
|              |     |                        |                        | D                      | D*                      | F*                     |                        |
| Argentina    | 33  | ORF1a                  | 16                     | -1.82615 <sup>+</sup>  | -2.21071                | -2.45823               | -8.832                 |
|              |     | ORF1b                  | 15                     | -1.98094*              | -3.31391 <sup>+</sup>   | -3.39523 <sup>+</sup>  | -10.215 <sup>+</sup>   |
|              |     | S                      | 5                      | -1.33955               | -1.01364                | -1.28968               | -2.647                 |
|              |     | ORF3a                  | 8                      | -1.67588*              | -2.57558 <sup>+</sup>   | -2.68828 <sup>+</sup>  | -4.441 <sup>+</sup>    |
|              |     | E                      | 2                      | 0.37079                | 0.58366                 | 0.60399                | 0.811                  |
|              |     | M                      | 4                      | -1.55202 <sup>+</sup>  | -1.52312                | -1.77563               | -2.867 <sup>+</sup>    |
|              |     | ORF6                   | 3                      | -0.50667               | -0.7684                 | -0.80206               | -0.47                  |
|              |     | ORF7a                  | 1                      | -                      | -                       | -                      | -                      |
|              |     | ORF7b                  | 1                      | -                      | -                       | -                      | -                      |
|              |     | ORF8                   | 1                      | -                      | -                       | -                      | -                      |
|              |     | N                      | 8                      | 0.2108                 | -0.42566                | -0.26753               | -0.53                  |
| ORF10        | 1   | -                      | -                      | -                      | -                       |                        |                        |
| Whole Genome | n   | Gene                   | H                      | Tajima                 |                         |                        | Fu's Fs                |
|              |     |                        |                        | D                      | D*                      | F*                     |                        |
| Brazil       | 426 | ORF1a                  | 178                    | -2.84952 <sup>++</sup> | -14.48328 <sup>++</sup> | -9.79754 <sup>++</sup> | -32.610 <sup>++</sup>  |
|              |     | ORF1b                  | 114                    | -2.80588 <sup>++</sup> | -12.0294 <sup>++</sup>  | -8.72919 <sup>++</sup> | -297.323 <sup>++</sup> |
|              |     | S                      | 71                     | -2.63997 <sup>++</sup> | -11.78005 <sup>++</sup> | -8.80706 <sup>++</sup> | -141.103 <sup>++</sup> |
|              |     | ORF3a                  | 34                     | -2.49335 <sup>++</sup> | -7.34023 <sup>++</sup>  | -6.3084 <sup>++</sup>  | -67.776 <sup>++</sup>  |
|              |     | E                      | 7                      | -1.78625*              | -4.54335 <sup>++</sup>  | -4.2941 <sup>++</sup>  | -16.410 <sup>++</sup>  |
|              |     | M                      | 16                     | -2.26224 <sup>++</sup> | -5.86568 <sup>++</sup>  | -5.39059 <sup>++</sup> | -38.413 <sup>++</sup>  |
|              |     | ORF6                   | 7                      | -0.76934               | -3.43331*               | -2.99937 <sup>++</sup> | -2.273                 |
|              |     | ORF7a                  | 9                      | -2.06792 <sup>++</sup> | -5.46773 <sup>++</sup>  | -5.07322 <sup>++</sup> | -19.695 <sup>++</sup>  |
|              |     | ORF7b                  | 4                      | -1.40288 <sup>++</sup> | -4.06054 <sup>++</sup>  | -3.79475 <sup>++</sup> | -9.086 <sup>++</sup>   |
|              |     | ORF8                   | 7                      | -1.75763*              | -3.43331 <sup>++</sup>  | -3.41748 <sup>++</sup> | -14.363 <sup>++</sup>  |
|              |     | N                      | 36                     | -2.08013 <sup>++</sup> | -8.31804 <sup>++</sup>  | -6.68319 <sup>++</sup> | -32.001 <sup>++</sup>  |
| ORF10        | 5   | -1.56346 <sup>++</sup> | -4.66408 <sup>++</sup> | -4.32413 <sup>++</sup> | -11.825 <sup>++</sup>   |                        |                        |



| Whole Genome | n   | Gene                  | H                    | Tajima                 |                        | Fu & Li                |                       | Fu's Fs |
|--------------|-----|-----------------------|----------------------|------------------------|------------------------|------------------------|-----------------------|---------|
|              |     |                       |                      | D                      | D*                     | F*                     | F*                    |         |
| Chile        | 162 | ORF1a                 | 36 <sup>++</sup>     | -2.54704 <sup>+</sup>  | -7.87474 <sup>++</sup> | -6.67628 <sup>++</sup> | -38.208 <sup>++</sup> |         |
|              |     | ORF1b                 | 34 <sup>++</sup>     | -2.53828 <sup>++</sup> | -6.15586 <sup>++</sup> | -5.55625 <sup>++</sup> | -44.112 <sup>++</sup> |         |
|              |     | S                     | 15 <sup>*</sup>      | -2.01238 <sup>++</sup> | -4.63578 <sup>++</sup> | -4.37553 <sup>++</sup> | -15.692 <sup>++</sup> |         |
|              |     | ORF3a                 | 9                    | -1.73012 <sup>*</sup>  | -2.22104 <sup>*</sup>  | -2.43953 <sup>*</sup>  | -8.354 <sup>++</sup>  |         |
|              |     | E                     | 1                    | -                      | -                      | -                      | -                     |         |
|              |     | M                     | 4 <sup>+</sup>       | -1.50083 <sup>++</sup> | -5.988 <sup>++</sup>   | -2.16857 <sup>++</sup> | -2.3041 <sup>++</sup> |         |
|              |     | ORF6                  | 3                    | -0.98497               | -1.17946               | -1.31525               | -2.034                |         |
|              |     | ORF7a                 | 6 <sup>++</sup>      | -1.83752 <sup>++</sup> | -4.61284 <sup>++</sup> | -4.36356 <sup>++</sup> | -10.81 <sup>++</sup>  |         |
|              |     | ORF7b                 | 3                    | -1.21636 <sup>++</sup> | -1.17946               | -1.4011                | -3.472 <sup>++</sup>  |         |
|              |     | ORF8                  | 4                    | -0.9269                | -2.16857 <sup>*</sup>  | -2.08562               | -1.947                |         |
|              |     | N                     | 14                   | -1.06193               | -1.79193               | -1.81509               | -3.772                |         |
| ORF10        | 1   | -                     | -                    | -                      | -                      |                        |                       |         |
| Colombia     | 107 | ORF1a                 | 37 <sup>++</sup>     | -2.65837 <sup>++</sup> | -7.41057 <sup>++</sup> | -6.56523 <sup>++</sup> | -52.184 <sup>++</sup> |         |
|              |     | ORF1b                 | 22                   | -2.39023 <sup>++</sup> | -4.92508 <sup>++</sup> | -4.72866 <sup>++</sup> | -26.040 <sup>++</sup> |         |
|              |     | S                     | 19 <sup>++</sup>     | -2.41607 <sup>++</sup> | -4.84516 <sup>++</sup> | -4.70056 <sup>++</sup> | -26.205 <sup>++</sup> |         |
|              |     | ORF3a                 | 9 <sup>++</sup>      | -2.02204 <sup>++</sup> | -2.00493 <sup>*</sup>  | -2.38353 <sup>*</sup>  | -11.256 <sup>++</sup> |         |
|              |     | E                     | 1                    | -                      | -                      | -                      | -                     |         |
|              |     | M                     | 5 <sup>*</sup>       | -1.62741 <sup>++</sup> | -1.49413               | -1.80914               | -5.615 <sup>++</sup>  |         |
|              |     | ORF6                  | 2                    | -0.9115                | 0.48816                | 0.07724                | -1.546                |         |
|              |     | ORF7a                 | 4 <sup>+</sup>       | -1.54213 <sup>++</sup> | -2.02337               | -2.19642 <sup>++</sup> | -5.085 <sup>++</sup>  |         |
|              |     | ORF7b                 | 1                    | -                      | -                      | -                      | -                     |         |
|              |     | ORF8                  | 2                    | -0.30254               | 0.48816                | 0.29131                | 0.048                 |         |
|              |     | N                     | 10 <sup>*</sup>      | -1.589 <sup>*</sup>    | -1.70712               | -1.98174               | -4.426                |         |
| ORF10        | 2   | -1.02032 <sup>*</sup> | -2.0485 <sup>*</sup> | -2.02738 <sup>*</sup>  | -2.276                 |                        |                       |         |



| Whole Genome | n   | Gene                   | H                      | Tajima                 | Fu & Li                |                        | Fu's Fs               |
|--------------|-----|------------------------|------------------------|------------------------|------------------------|------------------------|-----------------------|
|              |     |                        |                        | D                      | D*                     | F*                     |                       |
| Ecuador      | 67  | ORF1a                  | 20                     | -1.81305 <sup>+</sup>  | -2.82049 <sup>+</sup>  | -2.92156 <sup>+</sup>  | -9.91 <sup>+</sup>    |
|              |     | ORF1b                  | 17                     | -2.10908 <sup>+</sup>  | -3.63705 <sup>+</sup>  | -3.66961 <sup>+</sup>  | -9.894 <sup>*</sup>   |
|              |     | S                      | 3                      | -1.24375               | -1.84225               | -1.93658               | -1.02                 |
|              |     | ORF3a                  | 4                      | -1.32189 <sup>*</sup>  | -1.84225               | -1.96469               | -2.806 <sup>*</sup>   |
|              |     | E                      | 1                      | -                      | -                      | -                      | -                     |
|              |     | M                      | 3                      | 0.7115                 | -0.6539                | -0.2375                | 1.7017                |
|              |     | ORF6                   | 1                      | -                      | -                      | -                      | -                     |
|              |     | ORF7a                  | 1                      | -                      | -                      | -                      | -                     |
|              |     | ORF7b                  | 2                      | -1.0721                | -1.92436               | -1.94201               | -1.882                |
|              |     | ORF8                   | 2                      | -1.0721                | -1.92436               | -1.94201               | -1.882                |
| N            | 5   | 0.7115                 | -0.65392               | -0.24926               | 1.702 <sup>*</sup>     |                        |                       |
| ORF10        | 1   | -                      | -                      | -                      | -                      |                        |                       |
| Whole Genome | n   | Gene                   | H                      | Tajima                 | Fu & Li                |                        | Fu's Fs               |
|              |     |                        |                        | D                      | D*                     | F*                     |                       |
| Peru         | 303 | ORF1a                  | 130                    | -2.74537 <sup>++</sup> | -9.53654 <sup>++</sup> | -7.18273 <sup>++</sup> | -33.559               |
|              |     | ORF1b                  | 97                     | -2.61136 <sup>++</sup> | -7.97334 <sup>++</sup> | -6.36766 <sup>++</sup> | -31.992 <sup>++</sup> |
|              |     | S                      | 58                     | -2.52994 <sup>++</sup> | -6.73142 <sup>++</sup> | -5.72069 <sup>++</sup> | -86.05 <sup>++</sup>  |
|              |     | ORF3a                  | 32                     | -2.44302 <sup>++</sup> | -5.21523 <sup>++</sup> | -4.86163 <sup>++</sup> | -52.992 <sup>++</sup> |
|              |     | E                      | 2                      | -0.90963 <sup>*</sup>  | -2.29533 <sup>*</sup>  | -2.1619 <sup>*</sup>   | -3.162 <sup>++</sup>  |
|              |     | M                      | 11                     | -1.87433 <sup>++</sup> | -4.05035 <sup>++</sup> | -3.8966 <sup>++</sup>  | -11.646 <sup>++</sup> |
|              |     | ORF6                   | 4                      | -1.65212 <sup>++</sup> | -0.24065               | -0.86567               | -4.617 <sup>*</sup>   |
|              |     | ORF7a                  | 11                     | -1.94558 <sup>*</sup>  | -0.96155               | -1.59846               | -13.291 <sup>++</sup> |
|              |     | ORF7b                  | 4                      | -1.44924 <sup>++</sup> | -3.92223 <sup>++</sup> | -3.69484 <sup>++</sup> | -8.259 <sup>++</sup>  |
|              |     | ORF8                   | 11                     | -1.96005 <sup>*</sup>  | -5.21868 <sup>++</sup> | -4.82929 <sup>++</sup> | -15.896 <sup>++</sup> |
| N            | 30  | -1.79508 <sup>*</sup>  | -7.40257 <sup>++</sup> | -5.99857 <sup>++</sup> | -18.273 <sup>++</sup>  |                        |                       |
| ORF10        | 5   | -1.59521 <sup>++</sup> | -3.16082 <sup>++</sup> | -3.13979 <sup>++</sup> | -9.877 <sup>++</sup>   |                        |                       |



| Whole Genome | n  | Gene                   | H        | Tajima                | Fu & Li                |                        | Fu's Fs             |
|--------------|----|------------------------|----------|-----------------------|------------------------|------------------------|---------------------|
|              |    |                        |          | D                     | D*                     | F*                     |                     |
| Suriname     | 43 | ORF1a                  | 22       | -1.37246*             | -2.68076 <sup>++</sup> | -2.64619 <sup>++</sup> | -12.907             |
|              |    | ORF1b                  | 12       | -1.4038               | -1.5208                | -1.74984               | -4.401              |
|              |    | S                      | 11       | -1.74141 <sup>+</sup> | -2.98719 <sup>++</sup> | -3.04059 <sup>++</sup> | -6.878 <sup>+</sup> |
|              |    | ORF3a                  | 3        | 1.70713               | 0.76321                | 1.20403                | 1.625               |
|              |    | E                      | 1        | -                     | -                      | -                      | -                   |
|              |    | M                      | 1        | -                     | -                      | -                      | -                   |
|              |    | ORF6                   | 3        | -1.30235*             | -0.8495                | -1.13797               | -2.119              |
|              |    | ORF7a                  | 1        | -                     | -                      | -                      | -                   |
|              |    | ORF7b                  | 1        | -                     | -                      | -                      | -                   |
|              |    | ORF8                   | 4        | -0.144                | -0.37099               | -0.35282               | -0.34               |
| N            | 9* | -1.98912 <sup>++</sup> | -1.88024 | -2.2555               | -5.291 <sup>++</sup>   |                        |                     |
| ORF10        | 2  | -1.11747               | -1.79614 | -1.85123              | -1.51                  |                        |                     |

\*:  $p < 0.05$ ; \*\*:  $p < 0.02$ ; +:  $p < 0.01$ ; ++:  $p < 0.001$ . H: Haplotype-test
